# Supplementary material
Source: PubMed Central journal article supplement (PMC4572941)
Supplement: i1552-5783-56-10-5946-s01.pdf [file i1552-5783-56-10-5946-s01.pdf]

Supplementary Table 1. Molecular and LDF Characteristics of the ABCA4-RD Patients

| Patient† | Sex | ----- ABCA4 Allele 1 ----- |                          | ----- ABCA4 Allele 2 ----- |              | Age [yrs] |         | FU [yrs] | LDF eccentricity along principal meridians [deg] |          |         |          |         |          |         |             |         |             |         |
|----------|-----|----------------------------|--------------------------|----------------------------|--------------|-----------|---------|----------|--------------------------------------------------|----------|---------|----------|---------|----------|---------|-------------|---------|-------------|---------|
|          |     | Nucleotide                 | Amino acid               | Nucleotide                 | Amino acid   | Seg.*     | Visit 1 |          | Visit 2                                          | Superior |         | Inferior |         | Temporal |         | Inner Nasal |         | Outer Nasal |         |
|          |     |                            |                          |                            |              |           |         |          |                                                  | Visit 1  | Visit 2 | Visit 1  | Visit 2 | Visit 1  | Visit 2 | Visit 1     | Visit 2 | Visit 1     | Visit 2 |
| 4        | F   | c.161 G>A                  | p.Cys54Tyr               | c.2588 G>C                 | p.Gly863Ala  | Y         | 37.2    | 42.6     | 5.5                                              | 25.2     | 30.2    | 32.0     | 52.3    | 27.7     | 30.9    | 13.8        | 15.0    | 44.9        | 54.3    |
| 7        | M   | c.161 G>A                  | p.Cys54Tyr               | c.5882 G>A                 | p.Gly1961Glu | -         | 40.4    |          |                                                  | 4.7      |         | 4.8      |         | 5.8      |         | 7.1         |         |             |         |
| 11       | M   | c.454 C>T                  | p.Arg152Stop             | c.5882 G>A                 | p.Gly1961Glu | Y         | 21.2    | 29.0     | 7.8                                              | 5.6      | 10.9    | 5.8      | 12.7    | 6.6      | 13.8    | 5.8         | 11.6    |             | 27.1    |
| 12       | F   | c.454 C>T                  | p.Arg152Stop             | c.5882 G>A                 | p.Gly1961Glu | Y         | 19.5    | 24.4     | 4.9                                              | 3.9      | 4.8     | 3.7      | 3.7     | 5.8      | 6.9     | 4.9         | 4.9     |             |         |
| 21       | M   | c.768 G>T                  | p.Val256Val              | c.4577 C>T                 | p.Thr1526Met | Y         | 11.1    | 16.3     | 5.2                                              |          |         |          |         |          |         |             |         | 63.5        | 74.6    |
| 22       | F   | c.768 G>T                  | p.Val256Val              | c.5882 G>A                 | p.Gly1961Glu | Y         | 45.6    | 53.9     | 8.3                                              | 5.8      | 7.5     | 5.8      | 7.6     | 7.7      | 10.5    | 12.0        | 12.7    |             | 33.4    |
| 23       | F   | c.768 G>T                  | p.Val256Val              | c.5882 G>A                 | p.Gly1961Glu | Y         | 41.8    | 49.8     | 8.0                                              | 11.2     | 16.5    | 7.7      | 8.8     | 8.0      | 10.6    | 7.2         | 8.5     | 21.2        | 22.2    |
| 28       | M   | c.2041 C>T                 | p.Arg681Stop             | c.6449 G>A                 | p.Cys2150Tyr | Y         | 9.4     | 14.6     | 5.2                                              | 7.6      | 30.6    | 5.1      | 20.3    | 11.9     | 27.8    | 6.9         | 15.3    |             | 33.1    |
| 29       | M   | c.2588 G>C                 | p.Gly863Ala              | c.3322 C>T                 | p.Arg1108Cys | Y         | 31.4    | 35.3     | 4.0                                              | 5.8      | 5.8     | 5.7      | 6.0     | 6.6      | 6.8     | 5.8         | 7.1     |             |         |
| 30       | F   | c.2588 G>C                 | p.Gly863Ala              | c.4469 G>A                 | p.Cys1490Tyr | Y         | 36.6    | 44.3     | 7.7                                              | 22.4     | 29.3    | 17.6     | 28.8    | 20.9     | 29.6    |             |         | 41.1        | 60.1    |
| 32       | F   | c.2804 T>C                 | p.Val935Ala              | c.5714+5 G>A               | -            | Y         | 32.2    | 37.4     | 5.3                                              | 7.3      | 15.9    | 6.9      | 10.4    | 10.6     | 13.0    | 9.5         | 11.1    | 22.9        | 27.8    |
| 34       | M   | c.3056 C>T                 | p.Thr1019Met             | c.5882 G>A                 | p.Gly1961Glu | Y         | 29.6    | 38.7     | 9.1                                              | 4.8      | 6.8     | 9.4      | 11.8    | 8.1      | 14.7    | 8.7         | 10.2    |             | 25.7    |
| 36       | F   | c.1622 T>C;c.3113 C>T      | p.Leu541Pro;p.Ala1038Val | c.2894 A>G                 | p.Asn965Ser  | Y         | 19.3    |          |                                                  |          |         |          |         | 52.8     |         |             |         | 72.1        |         |
| 47       | F   | c.4139 C>T                 | p.Pro1380Leu             | c.5882 G>A                 | p.Gly1961Glu | Y         | 52.8    | 59.9     | 6.0                                              | 23.9     | 27.6    | 16.2     | 20.6    | 24.2     | 38.7    | 13.4        | 13.6    | 36.7        | 51.0    |
| 49       | F   | c.4222 T>C                 | p.Trp1408Arg             | c.5714+5 G>A               | -            | Y         | 14.1    | 20.1     | 6.0                                              | 26.8     | 51.0    | 16.2     | 40.5    | 26.7     | 47.6    | 9.8         | 11.8    | 37.8        | 56.1    |
| 52       | M   | c.4530_4531insC            | p.Pro1511fs              | c.5114 G>A                 | p.Arg1705Gln | Y         | 24.3    | 32.0     | 7.7                                              | 19.6     | 26.0    | 18.0     | 26.5    | 24.9     | 35.9    | 11.4        | 11.9    | 38.4        | 45.8    |
| 55       | F   | c.4577 C>T                 | p.Thr1526Met             | c.6089 G>A                 | p.Arg2030Gln | Y         | 49.8    | 57.3     | 4.9                                              | 24.4     | 26.7    | 20.8     | 22.6    | 26.7     | 30.8    | 8.8         | 8.8     | 39.7        | 58.1    |
| 58       | F   | c.4919 G>A                 | p.Arg1640Gln             | c.5882 G>A                 | p.Gly1961Glu | Y         | 54.6    | 61.9     | 7.3                                              | 22.8     | 24.6    | 19.6     | 20.4    | 24.6     | 25.4    | 13.7        | 13.7    | 38.9        | 44.4    |
| 64       | F   | c.3386 G>T                 | p.Arg1129Leu             | c.5819 T>C                 | p.Leu1940Pro | Y         | 25.3    | 32.4     | 7.1                                              | 7.4      | 8.8     | 5.8      | 12.4    | 8.9      | 15.8    | 7.7         | 10.1    |             | 30.0    |
| 66       | F   | c.2005_2006delAT           | p.Met669fs               | c.5882 G>A                 | p.Gly1961Glu | Y         | 60.7    |          |                                                  | 5.8      |         | 6.6      |         | 10.3     |         | 8.6         |         |             |         |
| 67       | F   | c.203 C>G                  | p.Pro68Arg               | c.634 C>T                  | p.Arg212Cys  | Y         | 21.9    |          |                                                  | 3.9      |         | 3.8      |         | 16.9     |         | 4.3         |         |             |         |
| 68       | M   | c.658 C>T                  | p.Arg220Cys              | c.3051-1 G>A               | -            | -         | 33.7    |          |                                                  | 68.7     |         |          |         | 64.4     |         |             |         | 71.9        |         |
| 69       | F   | c.1086 T>A                 | p.Tyr362Stop             | c.5461-10 T>C              | -            | Y         | 17.9    | 20.1     | 2.2                                              | 54.4     | 59.8    |          |         |          |         |             |         | 62.6        | 63.6    |
| 70       | M   | c.1822 T>A                 | p.Phe608Ile              | c.1022 A>G                 | p.Glu341Gly  | Y         | 7.0     | 12.0     | 5.0                                              | 5.1      | 48.4    | 4.6      |         | 7.1      | 47.3    | 5.9         | 15.3    |             | 62.5    |
| 71       | M   | c.2461 T>A                 | p.Trp821Arg              | c.2894 A>G                 | p.Asn965Ser  | Y         | 12.3    | 17.5     | 5.3                                              | 10.2     | 29.8    | 9.2      | 24.5    | 16.4     | 32.2    | 8.4         | 12.2    | 31.8        | 50.5    |
| 72       | M   | c.2461 T>A                 | p.Trp821Arg              | c.2894 A>G                 | p.Asn965Ser  | Y         | 16.1    | 21.4     | 5.3                                              | 25.0     | 47.1    | 23.0     | 41.7    | 22.5     | 38.4    | 13.8        | 13.8    | 32.9        | 55.7    |
| 73       | F   | c.2588 G>C                 | p.Gly863Ala              | c.5018+2 T>C               | -            | Y         | 34.0    |          |                                                  | 53.8     |         | 49.6     |         | 48.6     |         |             |         | 64.7        |         |
| 74       | M   | c.2588 G>C                 | p.Gly863Ala              | c.5018+2 T>C               | -            | Y         | 21.8    | 28.7     | 6.9                                              | 20.8     | 39.7    | 18.5     | 25.4    | 24.1     | 39.2    | 16.5        |         | 35.6        | 52.9    |
| 75       | M   | c.2588 G>C                 | p.Gly863Ala              | c.4978 C>T                 | p.Pro1660Ser | -         | 27.5    | 32.1     | 4.6                                              | 22.2     | 24.6    | 20.2     | 24.1    | 22.5     | 23.8    | 9.5         | 10.6    | 36.0        | 43.7    |
| 76       | F   | c.2966 T>C                 | p.Val989Ala              | c.4253+5 G>T               | -            | Y         | 16.1    |          |                                                  | 6.7      |         | 7.3      |         | 10.4     |         | 8.6         |         |             |         |
| 77       | F   | c.2966 T>C                 | p.Val989Ala              | c.4253+5 G>T               | -            | Y         | 17.4    |          |                                                  | 12.5     |         | 11.4     |         | 20.2     |         | 10.8        |         | 33.7        |         |
| 78       | F   | c.2966 T>C                 | p.Val989Ala              | c.4253+5 G>T               | -            | Y         | 18.3    |          |                                                  | 5.6      |         | 8.2      |         | 8.0      |         | 6.7         |         | 39.9        |         |
| 79       | F   | c.1622 T>C;c.3113 C>T      | p.Leu541Pro;p.Ala1038Val | c.5882 G>A                 | p.Gly1961Glu | Y         | 27.9    | 30.2     | 2.3                                              | 6.9      | 8.0     | 9.5      | 10.9    | 14.0     | 16.6    | 10.0        | 10.0    |             |         |
| 80       | F   | c.1622 T>C;c.3113 C>T      | p.Leu541Pro;p.Ala1038Val | c.5773 A>G                 | p.Arg1925Gly | Y         | 34.3    |          |                                                  | 18.2     |         | 18.4     |         | 21.0     |         | 11.0        |         | 29.2        |         |
| 81       | M   | c.3292 C>T                 | p.Arg1098Cys             | c.4352+5 G>A               | -            | Y         | 10.1    |          |                                                  | 4.4      |         | 3.5      |         | 4.6      |         | 4.4         |         |             |         |
| 82       | M   | c.3386 G>T                 | p.Arg1129Leu             | c.5882 G>A                 | p.Gly1961Glu | -         | 18.3    | 21.8     | 3.5                                              | 5.7      | 9.5     | 6.2      | 12.4    | 7.5      | 12.6    | 9.8         | 10.6    |             |         |
| 83       | M   | c.3190+21 A>G              | -                        | c.4139 C>T                 | p.Pro1380Leu | -         | 8.7     |          |                                                  | 26.2     |         | 24.9     |         | 33.4     |         | 12.6        |         | 39.8        |         |
| 84       | M   | deletion of exon 7         | -                        | c.4457 C>T                 | p.Pro1486Leu | Y         | 36.9    |          |                                                  | 69.8     |         |          |         | 55.9     |         |             |         | 73.4        |         |
| 85       | F   | deletion of exon 7         | -                        | c.4457 C>T                 | p.Pro1486Leu | Y         | 51.4    |          |                                                  | 68.5     |         |          |         | -        |         |             |         | 71.9        |         |
| 86       | M   | c.203 C>T;c.5882 G>A       | p.Pro68Leu;p.Gly1961Glu  | c.5882 G>A                 | p.Gly1961Glu | Y         | 20.5    |          |                                                  | 16.9     |         | 11.7     |         | 18.9     |         | 9.6         |         | 18.9        |         |
| 87       | M   | c.203 C>T;c.5882 G>A       | p.Pro68Leu;p.Gly1961Glu  | c.5882 G>A                 | p.Gly1961Glu | Y         | 23.1    |          |                                                  | 11.2     |         | 10.6     |         | 18.8     |         | 10.8        |         |             |         |
| 88       | F   | c.5312+1 G>A               | -                        | c.5882 G>A                 | p.Gly1961Glu | -         | 56.0    |          |                                                  | 25.3     |         | 14.8     |         | 14.7     |         | 12.1        |         | 46.2        |         |
| 89       | F   | c.5461-10 T>C              | -                        | c.6449 G>A                 | p.Cys2150Tyr | -         | 39.7    |          |                                                  | 66.9     |         | 47.2     |         | 55.1     |         |             |         |             |         |
| 90       | F   | c.6213 C>G                 | p.Tyr2071Stop            | c.6319 C>T                 | p.Arg2107Cys | Y         | 23.7    | 27.1     | 3.4                                              | 28.1     | 32.2    | 18.1     | 19.0    | 26.7     | 30.0    | 11.6        | 12.8    | 34.9        | 43.6    |

†Patient numbers 4-66 correspond to those previously published in Cideciyan et al., 2009. Patients 22,23; 71,72; 73,74; 76,77,78; 84,85; 86,87 are siblings

\*Parental segregation of the reported alleles confirmed (Y, yes) or not available (-).

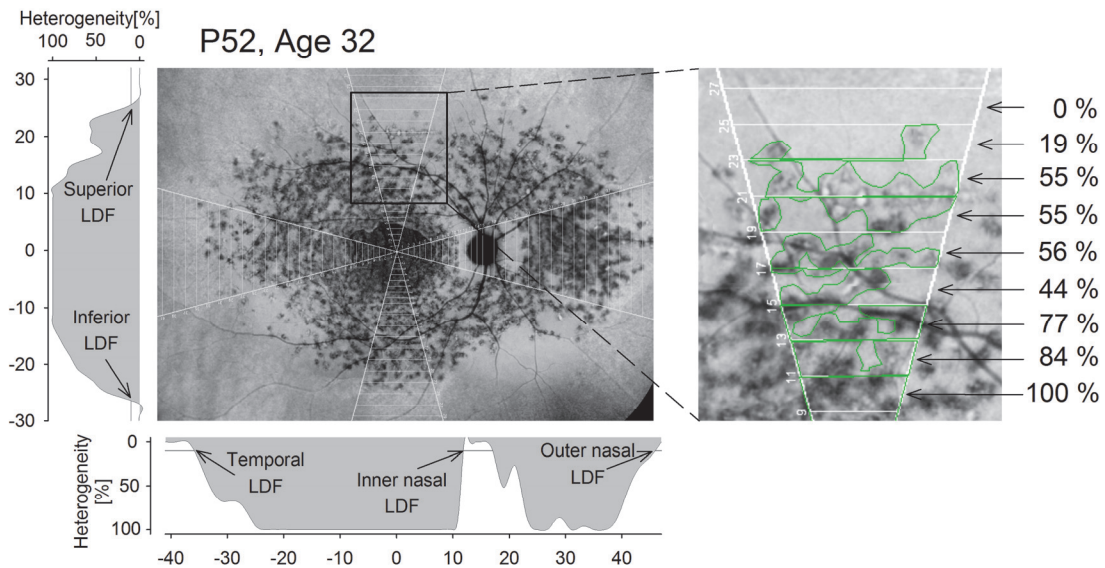

**SUPPLEMENTAL FIGURE 1.** Windmill analysis to determine the eccentricity of the LDF in *ABCA4*-RD along the four major meridians. Four 30° wedges starting at the anatomical fovea (determined using registered OCT image) and centered along each principle meridian are overlaid onto the wide-angle composite of NIR-RAFI. For the superior, temporal and inferior meridians, each wedge is divided into 1° segments up to eccentricities of 9° and 2° segments at further eccentricities. For the nasal meridian, 1° segments extend up to 15° eccentricity in order to obtain greater parapapillary detail. For each segment within the wedge, the fraction of the area showing local signal heterogeneity (Inset, green outline) is plotted as a function of eccentricity. Along each meridian, the furthest eccentricity showing a transition from less than 10% area of heterogeneity to greater than 10% is defined as the LDF (arrows on graphs). Along the nasal meridian, an inner nasal LDF is defined between the fovea and the optic nerve head and an outer nasal LDF at further eccentricities.
